# Supplementary material
Source: MDPI journal article supplement (https://www.mdpi.com/2071-1050/14/13/7993)
Supplement: s1 [file s1 › sustainability-1757884-supplementary.pdf]

## Supplementary Materials

### Supplementary S1

Design strategy framework for composites in a Circular Economy [16]. Showing circular strategies, design aspects and (in green) where a connection was found.

|                |                   | Circular economy strategies                 |                                           |                                            |                                |                                              |
|----------------|-------------------|---------------------------------------------|-------------------------------------------|--------------------------------------------|--------------------------------|----------------------------------------------|
|                |                   | Product Integrity                           |                                           |                                            | Materials Integrity            |                                              |
|                |                   | Long Life                                   | Lifetime Extension                        | Product Recovery                           | Structural Reuse               | Material Recycling                           |
|                |                   | Reuse<br>Long Use<br>Physical<br>Durability | Repair<br>Maintenance<br>Upgrade<br>Adapt | Refurbish<br>Reman.<br>Parts<br>Harvesting | Repurpose<br>Resize<br>Reshape | Remould<br>Mechanical<br>Thermal<br>Chemical |
| Design aspects | Concept design    | Accessibility                               |                                           |                                            |                                |                                              |
|                |                   | Adaptability                                |                                           |                                            |                                |                                              |
|                |                   | Cleanability                                |                                           |                                            |                                |                                              |
|                |                   | Dis-&reassembly                             |                                           |                                            |                                |                                              |
|                |                   | Ergonomics                                  |                                           |                                            |                                |                                              |
|                |                   | Fault isolation                             |                                           |                                            |                                |                                              |
|                |                   | Functional packaging                        |                                           |                                            |                                |                                              |
|                |                   | Interchangeability                          |                                           |                                            |                                |                                              |
|                |                   | Malfunction signaling                       |                                           |                                            |                                |                                              |
|                |                   | Simplification                              |                                           |                                            |                                |                                              |
|                | Embodiment design | Connection selection                        |                                           |                                            |                                |                                              |
|                |                   | Function integration                        |                                           |                                            |                                |                                              |
|                |                   | Keying                                      |                                           |                                            |                                |                                              |
|                |                   | Material selection                          |                                           |                                            |                                |                                              |
|                |                   | Manufacturing                               |                                           |                                            |                                |                                              |
|                |                   | Modularity                                  |                                           |                                            |                                |                                              |
|                |                   | Redundancy                                  |                                           |                                            |                                |                                              |
|                |                   | Sacrificial elements                        |                                           |                                            |                                |                                              |
|                |                   | Structural design                           |                                           |                                            |                                |                                              |
|                |                   | Surface treatments                          |                                           |                                            |                                |                                              |
|                | Detail design     | Documentation                               |                                           |                                            |                                |                                              |
|                |                   | Identification                              |                                           |                                            |                                |                                              |
|                |                   | Monitoring                                  |                                           |                                            |                                |                                              |
|                |                   | Standardization                             |                                           |                                            |                                |                                              |

| <b>Circular Strategies</b> | <b>Description</b>                                                                                                                                                                                                                   |
|----------------------------|--------------------------------------------------------------------------------------------------------------------------------------------------------------------------------------------------------------------------------------|
| <b>Long life</b>           | Ensuring long product lifetime by promoting long use and reuse of the product as a whole, through manufacturing physically durable products, resisting ageing, fatigue and corrosion, able to sustain wear and tear without failure. |
| <b>Lifetime extension</b>  | Extending the time in use through maintenance, repair, technical upgrading or adapting, by users or service personnel. This can be promoted by facilitating handling of the product and subsequent rework tasks.                     |
| <b>Product recovery</b>    | Returning products or parts to working condition, thereby increasing the number of use cycles.                                                                                                                                       |
| <b>Structural reuse</b>    | Retrieving structural elements, preserving the material composition, through repurposing, resizing or reshaping product parts for reuse in another context or construction.                                                          |
| <b>Recycling</b>           | Recovery of materials through thermal, chemical, or mechanical processes, resulting in raw materials ("recyclate"), aiming to close the materials loop.                                                                              |

| <b>Design Aspects</b>         | <b>Description</b>                                                                                                                                                                         |
|-------------------------------|--------------------------------------------------------------------------------------------------------------------------------------------------------------------------------------------|
| <b>Accessibility</b>          | Ensuring (internal) parts and materials as well as their connections can be reached and/or removed easily, keeping them at maximum utility level, and facilitating separation and sorting. |
| <b>Adaptability</b>           | Anticipating and enabling changes and adjustments to be made to the product during its (successive) use cycle(s).                                                                          |
| <b>Cleanability</b>           | Making products, parts, and surfaces so that they can be cleaned or prevent accumulation of dirt.                                                                                          |
| <b>Ergonomics</b>             | Ensuring the product can be used, maintained, reworked, and reprocessed in a safe and efficient way.                                                                                       |
| <b>Fault isolation</b>        | Enabling tracking an occurring fault to its cause, e.g., a worn component, for quick and easy repair.                                                                                      |
| <b>Functional packaging</b>   | Choosing packaging for the product and/or components to optimise transport and distribution.                                                                                               |
| <b>Interchangeability</b>     | Making parts or subassemblies of the product readily replaceable or exchangeable.                                                                                                          |
| <b>Malfunction signalling</b> | Indicating (imminent) product failure to facilitate inspection and subsequent actions.                                                                                                     |
| <b>Simplification</b>         | Minimising the complexity of the product in terms of functionality, assembly, appearance, and materials composition.                                                                       |
| <b>Connection selection</b>   | Selecting connections that can be accessed, opened, and reused where appropriate to facilitate use, rework, and recovery actions during product life.                                      |
| <b>Dis- and reassembly</b>    | Facilitating manual or mechanical disassembly and reassembly of the product to enable reuse of parts to improve the recovery rate.                                                         |
| <b>Function integration</b>   | Combining multiple functions and (sub)components into one part.                                                                                                                            |
| <b>Keying</b>                 | Using product shape to facilitate alignment, e.g., holes and pins                                                                                                                          |
| <b>Modularity</b>             | Grouping features within the product to create sub-assemblies that are accessible, removable, and interchangeable.                                                                         |
| <b>Redundancy</b>             | Adding additional materials or functionality to ensure continued operation and safety, even when parts degrade or are (partially) removed.                                                 |
| <b>Sacrificial elements</b>   | Defining replaceable components and surface treatments to take up wear and damage, thus protecting other parts.                                                                            |

|                                        |                                                                                                                                                                                                                                                               |
|----------------------------------------|---------------------------------------------------------------------------------------------------------------------------------------------------------------------------------------------------------------------------------------------------------------|
| <b>Material selection</b>              | Selecting matrix, reinforcement, connections, and other materials to perform optimally for the use phase, as well as recovery stage of the product. For composites, this includes the type and orientation of reinforcements.                                 |
| <b>Manufacturing process selection</b> | Selecting and optimising the process to minimise emissions and meet the material, functional, shape and recovery criteria.                                                                                                                                    |
| <b>Structural design</b>               | Optimising the material structure, shape, and product architecture to achieve the desired structural performance.                                                                                                                                             |
| <b>Surface treatments</b>              | Selecting coatings and other surface treatments appropriate for the use, reuse and reprocessing of the product and its materials.                                                                                                                             |
| <b>Documentation</b>                   | Providing information about the product, components, and functions to stakeholders in the value chain and actors in the product and component lifecycle.                                                                                                      |
| <b>Identification</b>                  | Using labels, tags etc. to facilitate recognition of the product, parts, materials and/or its specifications.                                                                                                                                                 |
| <b>Monitoring</b>                      | Determining and logging of product properties and use conditions over the product lifetime.                                                                                                                                                                   |
| <b>Standardisation</b>                 | Using well-known, defined, and widely used components, processes, dimensions, materials, etc., in the product design, or developing a standard layout for the product(range). This design aspect relates, but is not restricted to, industry standardisation. |

## Supplementary S2

Questionnaire on prior knowledge and method usage. Content derived from [26] is indicated in italics.

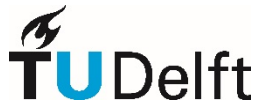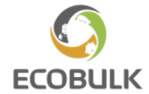

### Design strategies for composites in a Circular Economy Questionnaire

1. Name: ...
2. Please indicate if and how you learned about Circular Product Design *before* you started on the project (select all that apply and add additional details if available):
  - ☐ I didn't have any prior knowledge
  - ☐ Familiar with CE from Ellen MacArthur Foundation
  - ☐ MOOCS: ...
  - ☐ Reading on the subject: ...
  - ☐ Explanatory videos
  - ☐ (Students:) Courses at Industrial Design Engineering: ...
  - ☐ Other: ...
3. In the project, you were given a Design framework for composite products in a CE. The framework connected circular strategies (e.g. remanufacturing or reconfiguration) to design principles (e.g. modularity and connection selection). Please indicate (tick the boxes) for which actions you referred to the design framework:

In this design project, I used the circular product design framework for composites to ...

| Analysis                                                                       | Circular Strategies | Design Principles |
|--------------------------------------------------------------------------------|---------------------|-------------------|
| 1. ... <i>form an understanding of the problems surrounding product ideas.</i> |                     |                   |
| 2. ... <i>explore design problems.</i>                                         |                     |                   |
| 3. ... <i>understanding design challenges</i>                                  |                     |                   |
| 4. ... <i>understand what to design.</i>                                       |                     |                   |
| <b>Synthesis</b>                                                               |                     |                   |
| 5. ... <i>generate initial proposals for my designs.</i>                       |                     |                   |
| 6. ... <i>generate ideas.</i>                                                  |                     |                   |
| 7. ... <i>generate concepts.</i>                                               |                     |                   |
| <b>Simulation</b>                                                              |                     |                   |
| 8. ... <i>try out proposals of my designs.</i>                                 |                     |                   |
| 9. ... <i>run through the properties of my designs.</i>                        |                     |                   |
| 10. ... <i>develop prototypes of my ideas.</i>                                 |                     |                   |
| <b>Evaluation</b>                                                              |                     |                   |
| 11. ... <i>test my design proposals.</i>                                       |                     |                   |
| 12. ... <i>evaluate my design proposals.</i>                                   |                     |                   |
| 13. ... <i>check the quality of my ideas.</i>                                  |                     |                   |
| <b>Decision-making</b>                                                         |                     |                   |
| 14. ... <i>decide which of my ideas to continue with.</i>                      |                     |                   |
| 15. ... <i>decide whether I need to redo designs.</i>                          |                     |                   |
| 16. ... <i>aid me in taking important design decisions.</i>                    |                     |                   |

End of questionnaire

## Supplementary S3

### Semi-structured interview setup

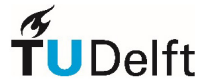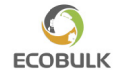

#### Design strategies for composites in a Circular Economy

---

##### Contact details

Researcher:  
Jelle Joustra

Participant:

##### Semi-structured interview [With design object or photo's]

1. How did you learn about the design method ? (*coaching, paper, reading, learning by doing*)
  - a. How did this help you to understand the design method?
2. Can you tell how you used the design strategy framework for your project?
  - a. Which circular strategies did you select, and why?
  - b. Which design principles did you use, and why?
3. Was the design method usable to the specific context?
  - a. Did you find opportunities for the design?
  - b. Did you find challenges for the design?
4. Which decisions you took were inspired by Circular Strategies or Design Principles?

## Supplementary S4

Codes used to analyse the interview responses

**Table S4.1.** Aspects and codes used to analyse effectiveness of the design method in practice.

| Aspects of effectiveness | Codes              |
|--------------------------|--------------------|
| Level of integrity       | Product integrity  |
|                          | Material integrity |
| Circular system          | Open               |
|                          | Closed             |

**Table S4.2.** Aspects and codes used to analyse the accessibility of the design method in practice.

| Aspects of accessibility | Codes                                    |
|--------------------------|------------------------------------------|
| Prior experience         | Recovery considered in design            |
|                          | Use of retrieved materials in production |
|                          | none                                     |
| Accessing the method     | Ellen MacArthur Foundation               |
|                          | Open Courseware                          |
|                          | Reading                                  |
|                          | Videos                                   |
|                          | Courses                                  |
|                          | Other                                    |
| Understanding the method | Terminology                              |
|                          | Framing of circular economy              |
|                          | Match with design practice               |

**Table S4.3.** Aspects and codes used to analyse the usability of the design method in practice.

| Aspects of usability                                        | Codes                                  |
|-------------------------------------------------------------|----------------------------------------|
| Use in design process;<br>Using the method to find...       | Opportunities found using the method   |
|                                                             | Challenges found using the method      |
| Tasks in the basic design cycle<br>After [12], Supplement 2 | Analysis                               |
|                                                             | Synthesis                              |
|                                                             | Simulation                             |
|                                                             | Evaluation                             |
|                                                             | Decision making                        |
| Method manifestations related<br>to design tasks            | Idea generator                         |
|                                                             | Evaluation checklist                   |
|                                                             | Communication tool                     |
|                                                             | Detailing product concept              |
| Suitability to case                                         | Backing up choices/building confidence |
|                                                             | Circular strategies                    |
|                                                             | Design aspects                         |

Filename: sustainability-1757884-supplementary.docx  
Directory: E:\6.30\materials-1770924  
Template: C:\Users\jellejoustra\Documents\Documentation\Templates\sustainability-template.dot

Title:  
Subject:  
Author: Jelle Joustra - IO  
Keywords:  
Comments:  
Creation Date: 6/29/2022 11:18:00 PM  
Change Number: 4  
Last Saved On: 6/30/2022 10:40:00 AM  
Last Saved By: MDPI  
Total Editing Time: 4 Minutes  
Last Printed On: 6/30/2022 4:53:00 PM

As of Last Complete Printing

Number of Pages: 6  
Number of Words: 1,170 (approx.)  
Number of Characters: 7,643 (approx.)
